# Supplementary material for: Bibliometric Analysis of the Knowledge Base and Future Trends on Sarcopenia from 1999–2021
Source: MDPI journal article supplement (doi:10.3390/ijerph19148866), 2022-07-21
Supplement: s1 [file s1]

**Table S1.** The top 10 most productive countries in the sarcopenia research field.

| Countries   | Documents | Number of papers per trillion GDP | Citations | TLS |
|-------------|-----------|-----------------------------------|-----------|-----|
| USA         | 690       | 33.22                             | 47260     | 551 |
| China       | 534       | 36.10                             | 13687     | 172 |
| Japan       | 524       | 104.99                            | 16829     | 104 |
| Italy       | 358       | 191.14                            | 29605     | 478 |
| South Korea | 315       | 194.15                            | 9220      | 100 |
| UK          | 250       | 99.28                             | 22401     | 442 |
| Spain       | 185       | 144.36                            | 17890     | 335 |
| Germany     | 179       | 47.06                             | 18940     | 297 |
| Brazil      | 173       | 120.44                            | 3587      | 100 |
| France      | 171       | 65.39                             | 22583     | 330 |

GDP is the gross domestic product; TLS is the total link strength. Data on GDP and percentage of aged 65 or above of countries were obtained from the World Bank (<http://data.worldbank.org/indicator>).

**Table S2.** Correlation between the number of publications in sarcopenia and GDP or percentage of old adults of the countries.

|                        | GDP         | Percentage of the population aged 65 or above |
|------------------------|-------------|-----------------------------------------------|
| Number of publications | $r = 0.851$ | $r = 0.338$                                   |
|                        | $P < 0.001$ | $P = 0.003$                                   |

GDP is the gross domestic product,  $P$  value less than 0.05 was considered statistically significant.

**Table S3.** The top 10 most prolific organizations in the sarcopenia research field.

| Organizations                                  | Country     | NP | NC    | TLS |
|------------------------------------------------|-------------|----|-------|-----|
| Catholic University of the Sacred Heart        | Italy       | 92 | 16032 | 119 |
| University of Melbourne                        | Australia   | 73 | 1633  | 66  |
| Sichuan University                             | China       | 65 | 1155  | 1   |
| University of Liege                            | Belgium     | 55 | 5208  | 62  |
| University of Southampton                      | UK          | 51 | 5609  | 109 |
| Yonsei University                              | South Korea | 51 | 1032  | 7   |
| University of Florida                          | USA         | 49 | 4794  | 101 |
| National Center for Geriatrics and Gerontology | Japan       | 49 | 3836  | 58  |
| Seoul National University                      | South Korea | 48 | 2187  | 31  |
| Maastricht University                          | Netherlands | 41 | 2330  | 32  |

NP is the number of publications, NC is the number of citations, TLS is total link strength.

**Table S4.** The top 10 most productive authors in the sarcopenia research field.

| Authors      | Affiliations                            | NP | NC    | TLS |
|--------------|-----------------------------------------|----|-------|-----|
| Landi F      | Catholic University of the Sacred Heart | 70 | 14706 | 322 |
| Marzetti E   | Catholic University of the Sacred Heart | 49 | 3017  | 221 |
| Cesari M     | University of Milan                     | 48 | 3297  | 175 |
| Bruyere O    | University of Liege                     | 44 | 4805  | 147 |
| Beaudart C   | University of Liege                     | 42 | 1995  | 132 |
| Bernabei R   | Catholic University of the Sacred Heart | 40 | 3180  | 187 |
| Cooper C     | University of Southampton               | 39 | 5225  | 119 |
| Sayer AA     | Newcastle University                    | 39 | 4881  | 62  |
| Calvani R    | Catholic University of the Sacred Heart | 39 | 2036  | 196 |
| Reginster JY | University of Liege                     | 32 | 2091  | 123 |

NP is the number of publications, NC is the number of citations, TLS is total link strength.

**Table S5.** The top 25 most frequently used keywords on sarcopenia research.

| Keywords             | Occurrence | TLS   |
|----------------------|------------|-------|
| sarcopenia           | 2573       | 15291 |
| muscle mass          | 1053       | 7229  |
| skeletal-muscle      | 937        | 5355  |
| older-adults         | 838        | 5867  |
| body-composition     | 835        | 5706  |
| prevalence           | 729        | 5165  |
| age                  | 640        | 3949  |
| mortality            | 516        | 3599  |
| obesity              | 487        | 3394  |
| strength             | 486        | 3421  |
| frailty              | 420        | 2773  |
| consensus            | 399        | 2641  |
| mass                 | 393        | 2689  |
| health               | 349        | 2559  |
| muscle strength      | 328        | 2335  |
| association          | 322        | 2332  |
| risk                 | 309        | 2161  |
| exercise             | 291        | 1950  |
| survival             | 287        | 1818  |
| muscle               | 276        | 1724  |
| men                  | 274        | 2044  |
| women                | 265        | 2025  |
| adults               | 262        | 1829  |
| physical-activity    | 253        | 1716  |
| physical performance | 241        | 1767  |

TLS is total link strength.

**Table S6.** The most highly cited references in the sarcopenia research field.

| Rank | Title                                                                                                                                                                                                   | First author    | Journals                                                                           | PY   | Citations |
|------|---------------------------------------------------------------------------------------------------------------------------------------------------------------------------------------------------------|-----------------|------------------------------------------------------------------------------------|------|-----------|
| 1    | Sarcopenia: European consensus on definition and diagnosis                                                                                                                                              | Cruz-Jentoft AJ | <i>Age and Aging</i>                                                               | 2010 | 6271      |
| 2    | Sarcopenia: revised European consensus on definition and diagnosis                                                                                                                                      | Cruz-Jentoft AJ | <i>Age and Aging</i>                                                               | 2019 | 2615      |
| 3    | Sarcopenia in Asia: Consensus Report of the Asian Working Group for Sarcopenia                                                                                                                          | Chen LK         | <i>Journal of the American Medical Directors Association</i>                       | 2014 | 1949      |
| 4    | Low relative skeletal muscle mass (sarcopenia) in older persons is associated with functional impairment and physical disability                                                                        | Janssen I       | <i>Journal of the American Geriatrics Society</i>                                  | 2002 | 1875      |
| 5    | Sarcopenia: An Undiagnosed Condition in Older Adults. Current Consensus Definition: Prevalence, Etiology, and Consequences. International Working Group on Sarcopenia                                   | Fielding RA     | <i>Journal of the American Medical Directors Association</i>                       | 2011 | 1675      |
| 6    | Age-associated changes in skeletal muscles and their effect on mobility: an operational diagnosis of sarcopenia                                                                                         | Lauretani F     | <i>Journal of Applied Physiology</i>                                               | 2003 | 1121      |
| 7    | Aging and sarcopenia                                                                                                                                                                                    | Doherty TJ      | <i>Journal of Applied Physiology</i>                                               | 2003 | 1072      |
| 8    | The FNIH Sarcopenia Project: Rationale, Study Description, Conference Recommendations, and Final Estimates                                                                                              | Studenski SA    | <i>Journals of Gerontology, Series A: Biological Sciences and Medical Sciences</i> | 2014 | 1017      |
| 9    | Consensus definition of sarcopenia, cachexia and pre-cachexia: Joint document elaborated by Special Interest Groups (SIG) "cachexia-anorexia in chronic wasting diseases" and "nutrition in geriatrics" | Muscaritoli M   | <i>Clinical Nutrition</i>                                                          | 2010 | 961       |
| 10   | Prevalence of and interventions for sarcopenia in ageing adults: a systematic review. Report of the International Sarcopenia Initiative (EWGSOP and IWGS)                                               | Cruz-Jentoft AJ | <i>Age and Aging</i>                                                               | 2014 | 905       |

PY is the publication year.
